# Supplementary material for: The anti-inflammation, anti-oxidative and anti-fibrosis properties of swertiamarin in cigarette smoke exposure-induced prostate dysfunction in rats
Source: publisher site journal article supplement (doi:10.18632/aging.102467), 2019-11-17
Supplement: Supplementary file [file aging-v11i22-102467-supplementary-material-SD1.pdf]

**SUPPLEMENTARY FIGURES**

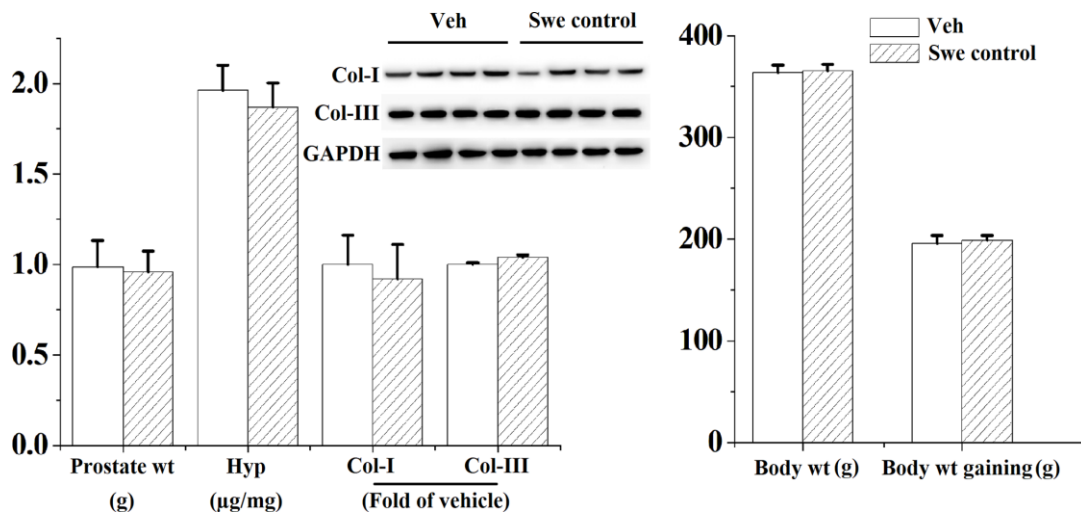

**Supplementary Figure 1. Effects of sweriamarin on (n=6 per group) body weight (wt), body wt gaining, prostate wt and Hyp content, as well as on (n=4 per group) prostatic expression of Col-I and Col-III. Veh: vehicle, Swe Control: 32 mg/kg/d sweriamarin but without CS treatment.**

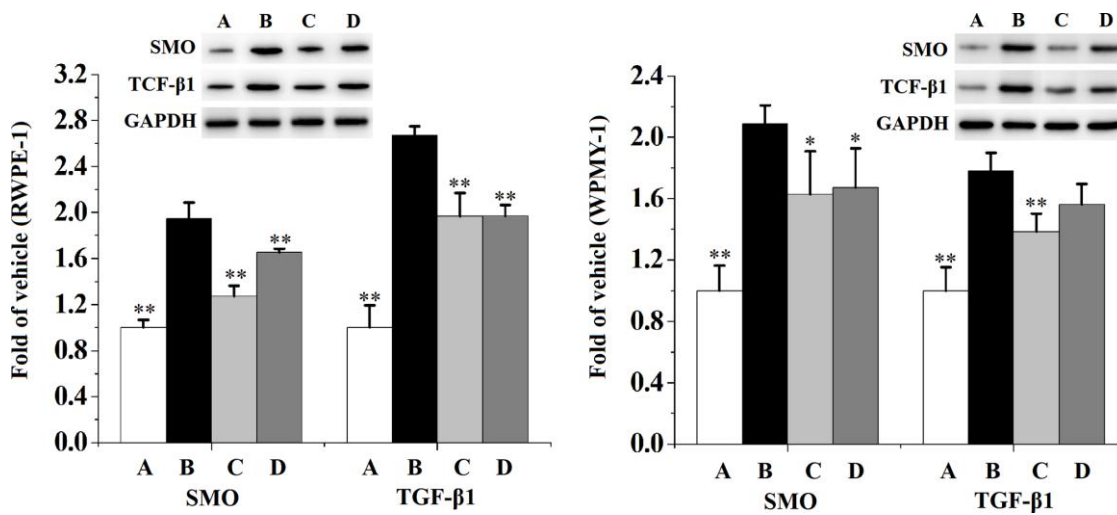

**Supplementary Figure 2. Effects of sweriamarin on (n=4 per group) the expression of SHH and IHH in RWPE-1 and WPMY-1 cells. Veh: vehicle, Swe control: 30 µmol/L sweriamarin but without CS treatment.**

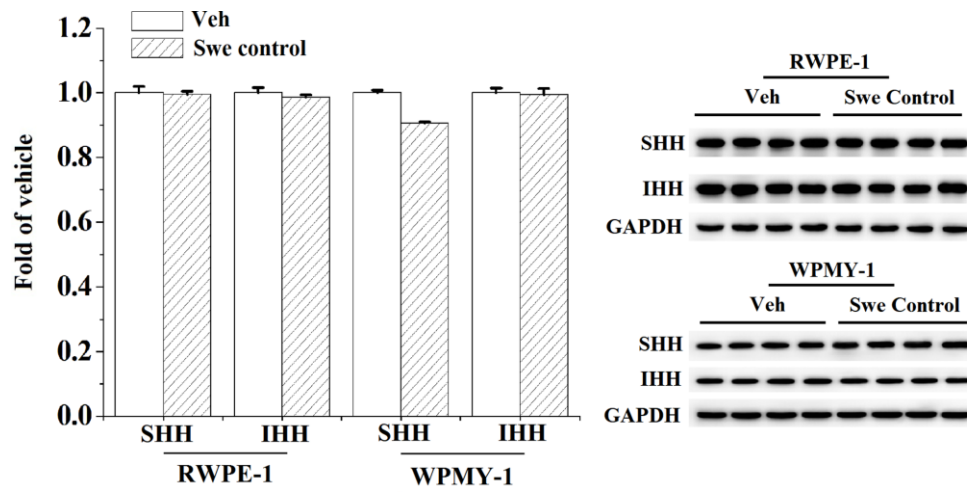

**Supplementary Figure 3. GDC-0449 inhibited the (n=3 per group) expression of SMO and TGF- $\beta$ 1 in RWPE-1 and WPMY-1 cells.** \*\*  $p < 0.01$  compared to the CS model group. \*  $p < 0.05$  compared to the CS model group. A: vehicle, B: 5% CS, C: 5% CS-10  $\mu\text{mol/L}$  GDC-0449, D: 5% CS-5  $\mu\text{mol/L}$  GDC-0449.
